# Supplementary material for: The Effects of Psilocybin on Lipopolysaccharide-Induced Inflammation in THP-1 Human Macrophages
Source: MDPI journal article supplement (doi:10.3390/psychoactives3010004), 2024-01-28
Supplement: s1 [file s1]

**The whole western blot images**

**Inflammation part**

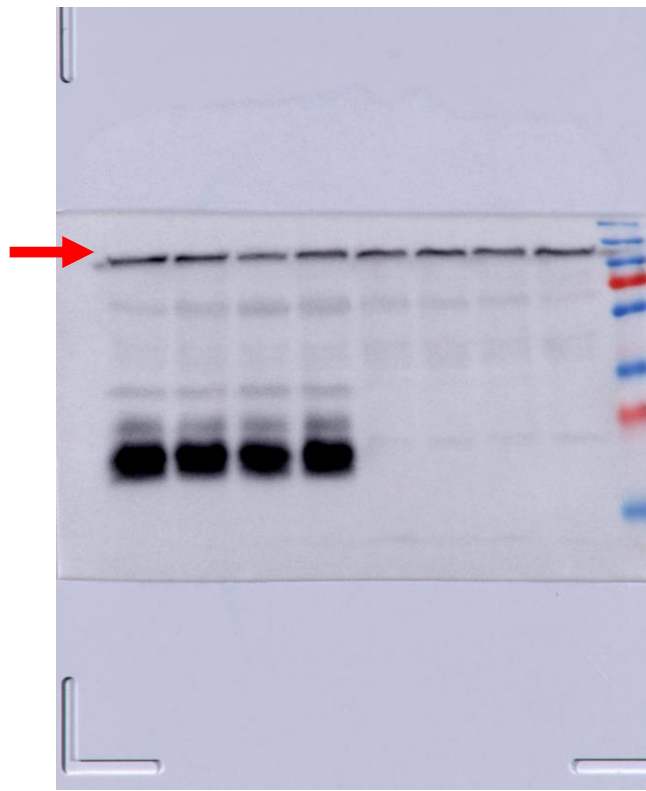

NLRP3- 110 KDa

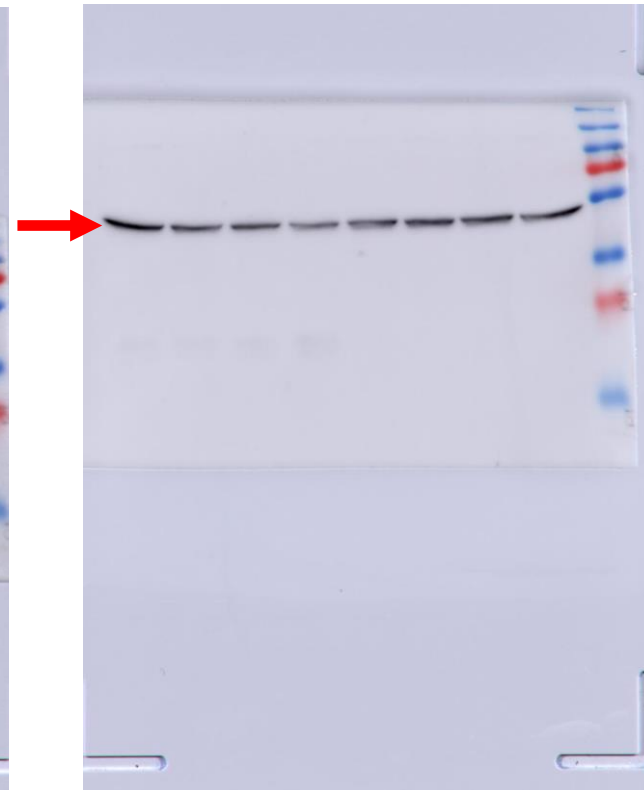

SR-2A- 55KDa

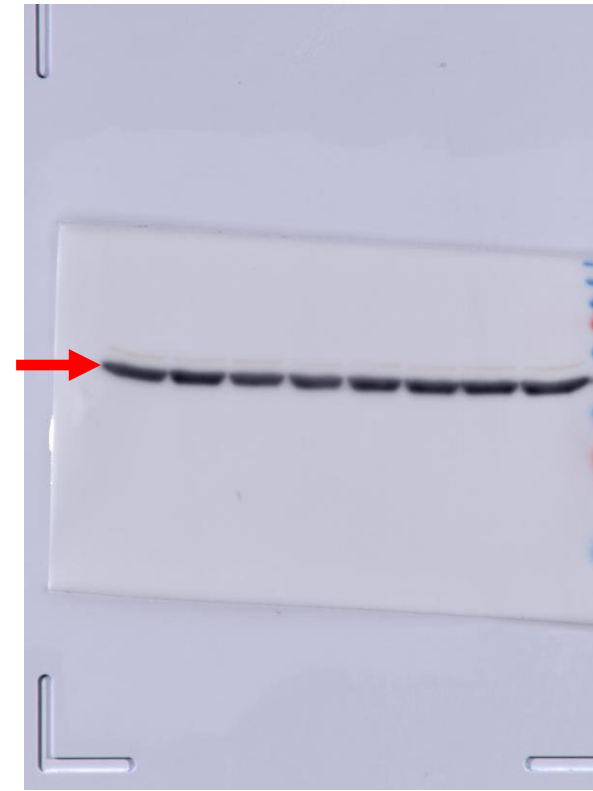

Actin- 45KDa

The order of lanes: Right- (Ct-Ct+Psi5-Ct+Psi10-Ct+Psi15-LPS-LPS+Psi5-LPS+Psi10-LPS+Psi15) -Left

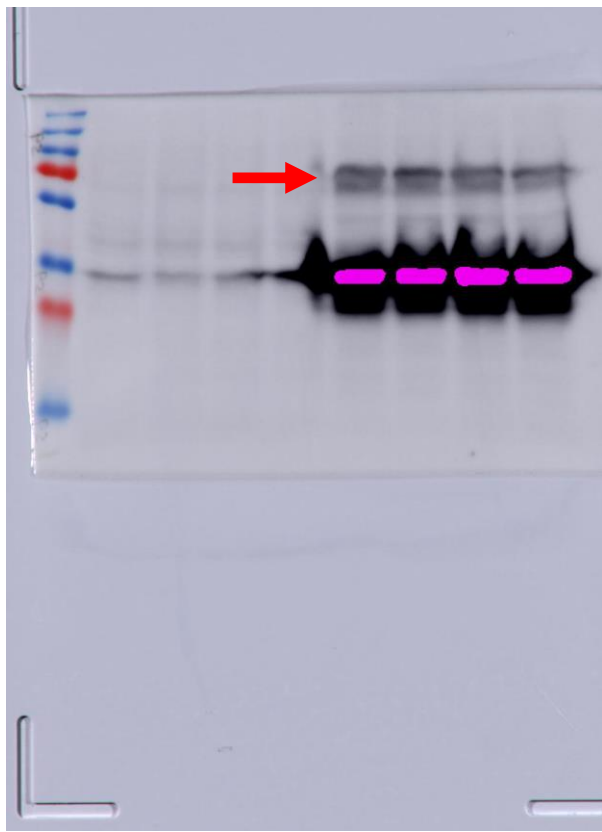

COX-2- 74 KDa

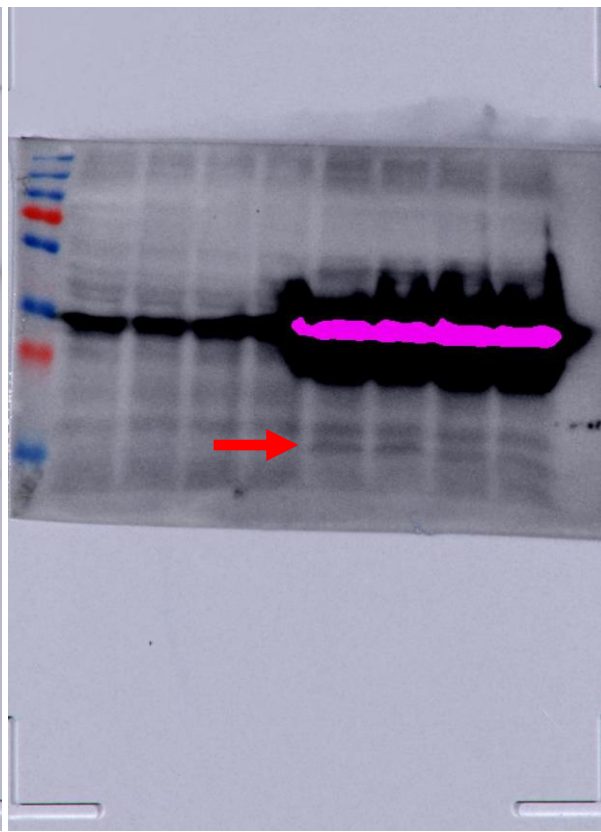

IL-1beta- 17KDa

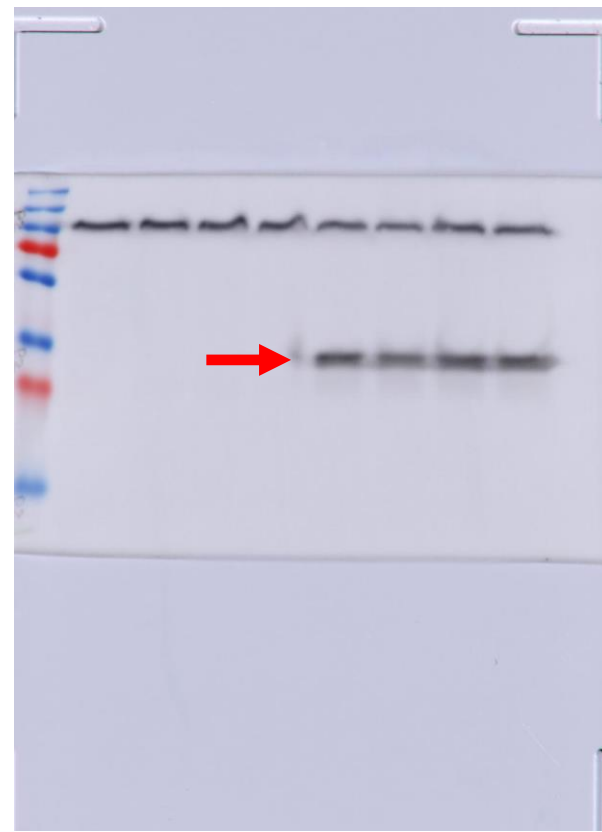

Pro-IL-1beta 31 KDa

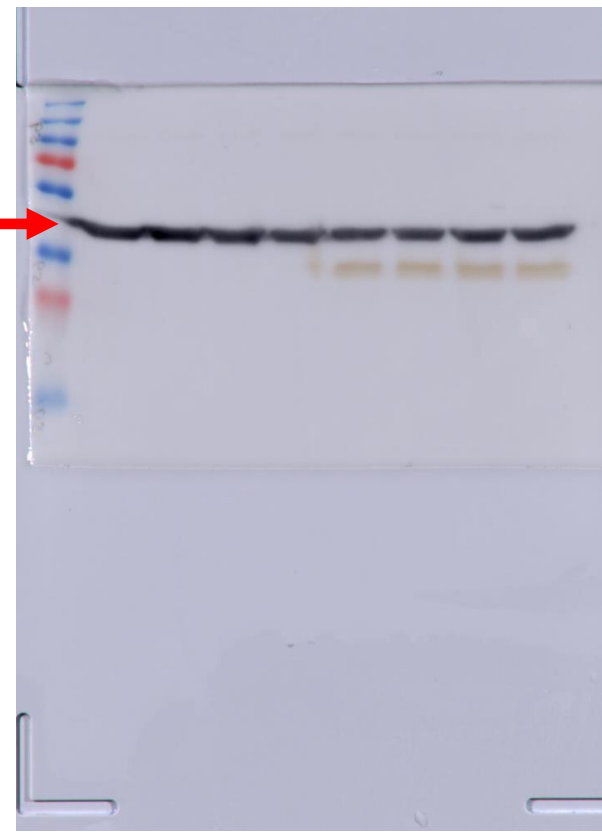

Actin-45 KDa

The order of lanes: Left- (Ct-Ct+Psi5-Ct+Psi10-Ct+Psi15-LPS-LPS+Psi5-LPS+Psi10-LPS+Psi15) -Right

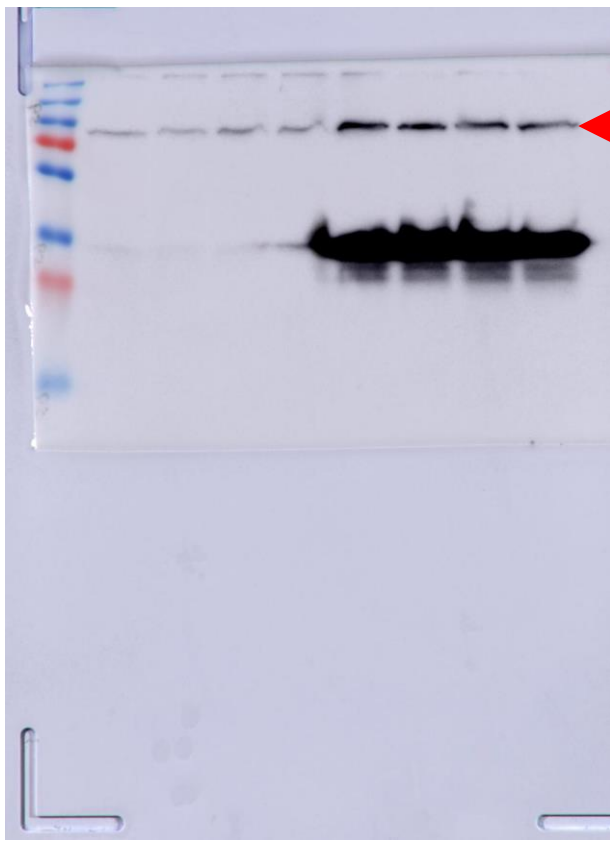

P-STAT1- 87 KDa

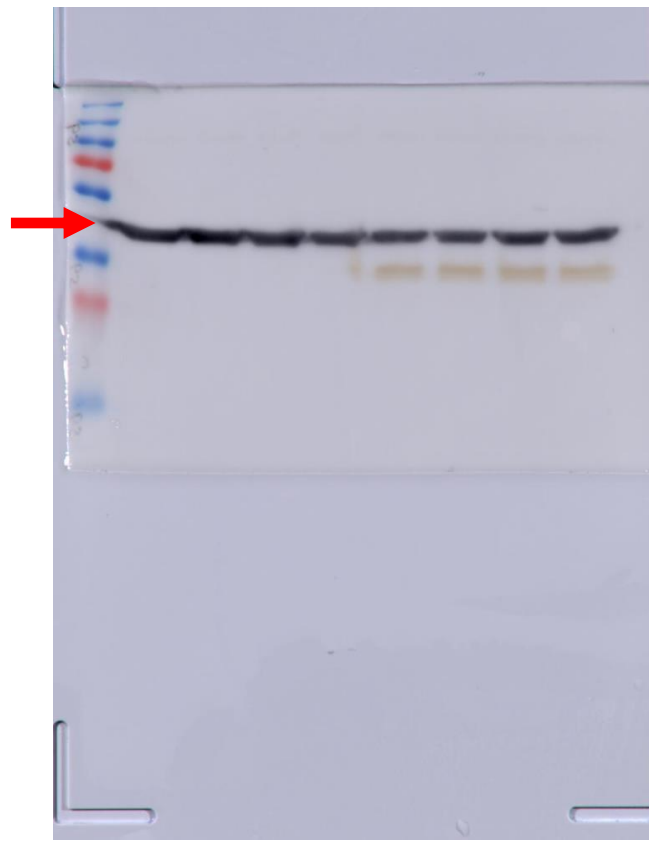

Actin-45 KDa

The order of lanes: Left- (Ct-Ct+Psi5-Ct+Psi10-Ct+Psi15-LPS-LPS+Psi5-LPS+Psi10-LPS+Psi15) -Right

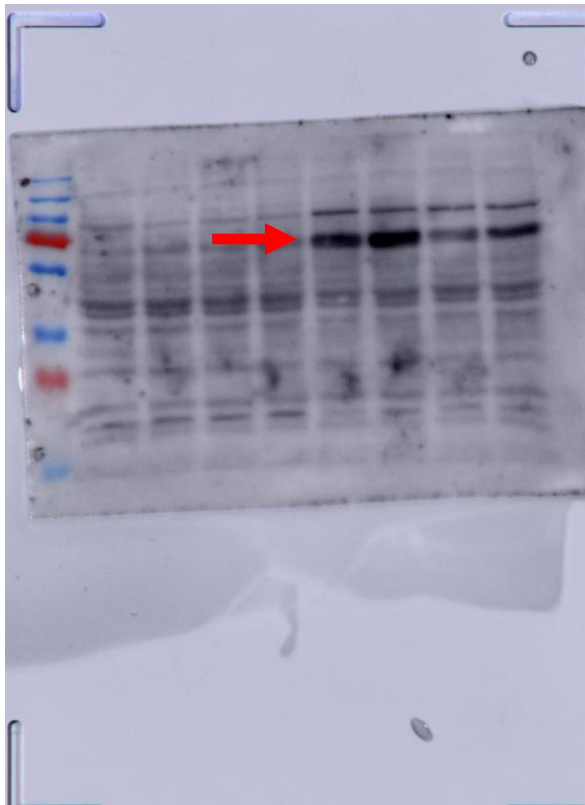

P-NF-kB- 65 KDa

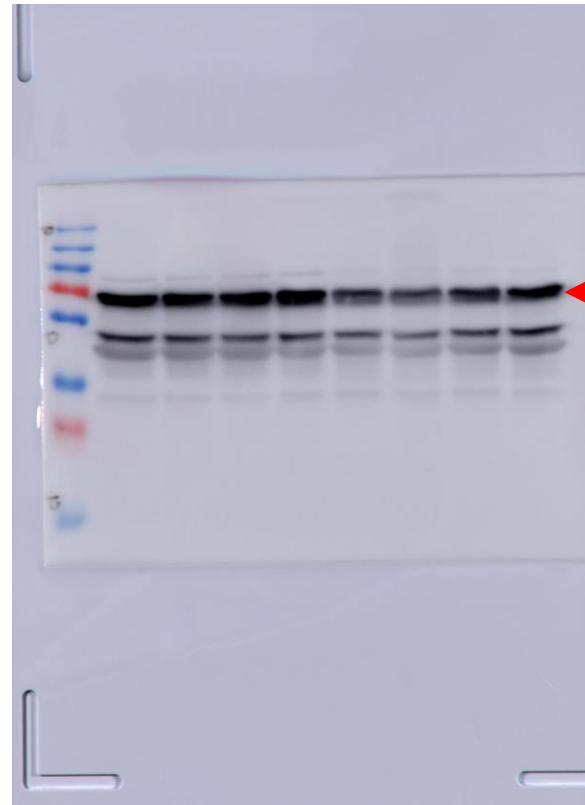

NF-kB- 65 KDa

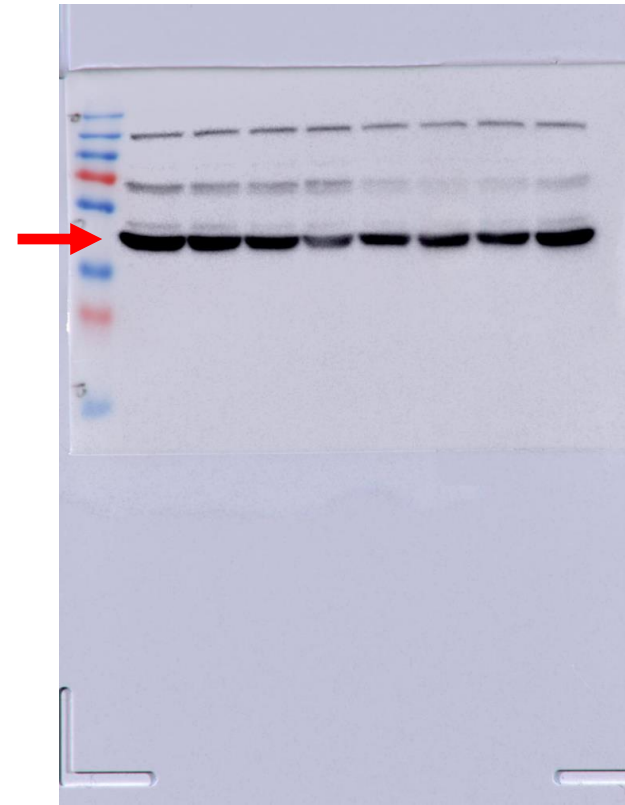

Actin- 45 KDa

The order of lanes: Left- (Ct-Ct+Psi5-Ct+Psi10-Ct+Psi15-LPS-LPS+Psi5-LPS+Psi10-LPS+Psi15) -Right

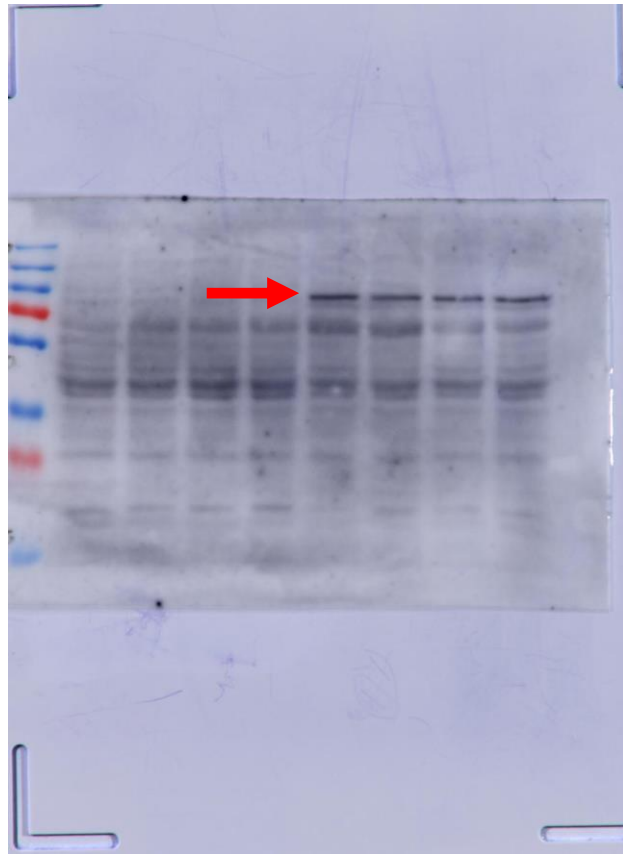

P-STAT3- 91/86 KDa

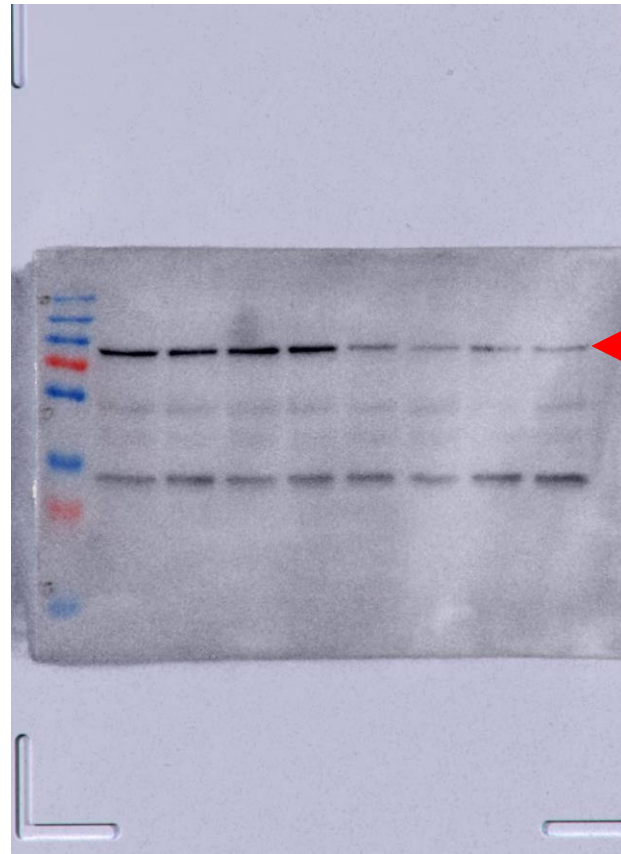

STAT3- 91/86 KDa

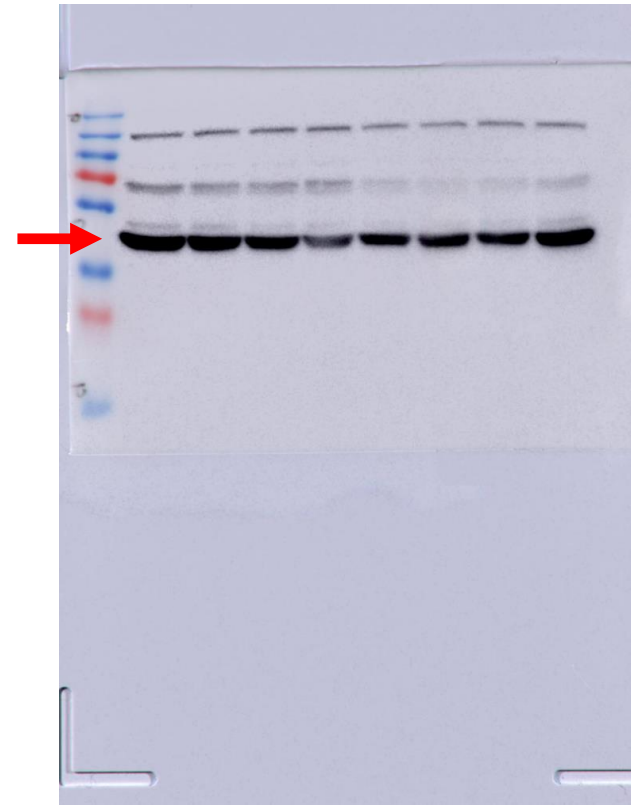

Actin- 45 KDa

The order of lanes: Left- (Ct-Ct+Psi5-Ct+Psi10-Ct+Psi15-LPS-LPS+Psi5-LPS+Psi10-LPS+Psi15) -Right

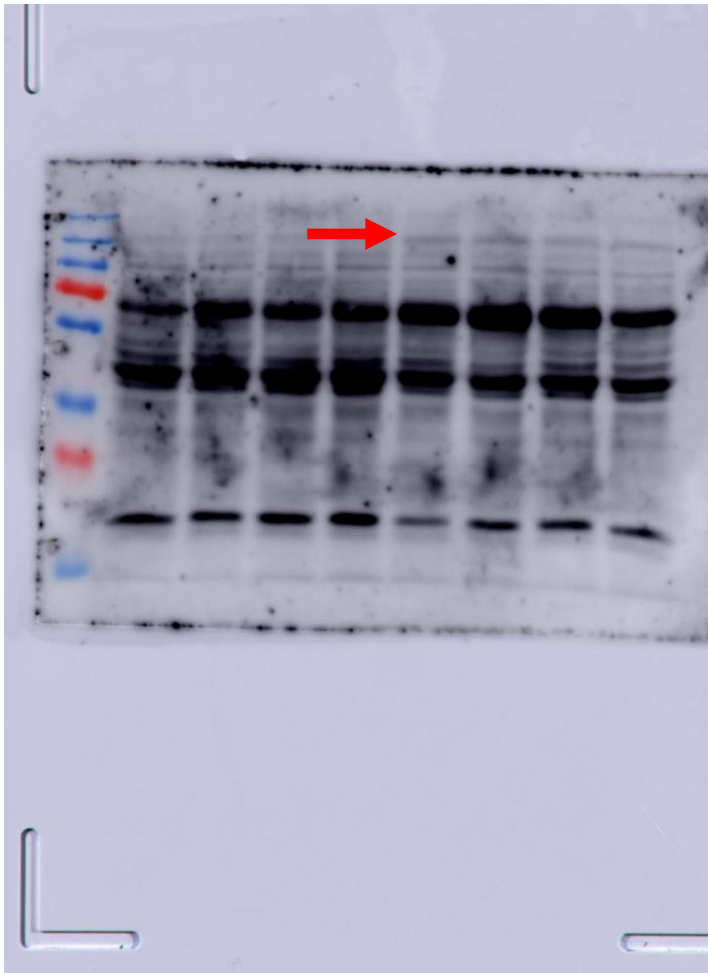

P-TYK-2- 134 KDa

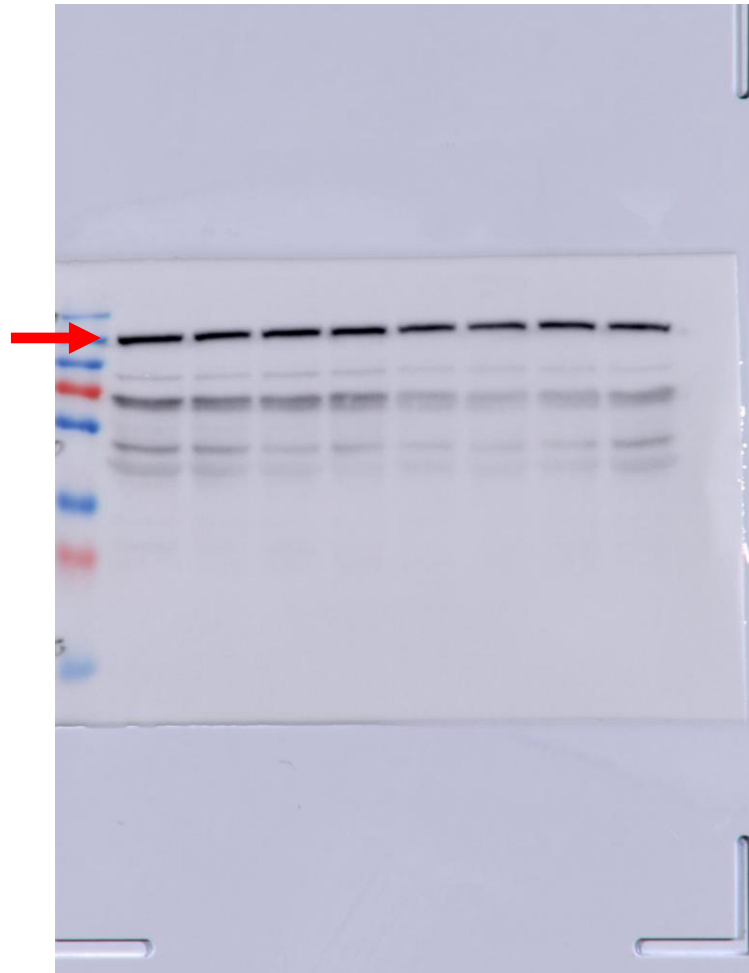

TYK-2- 134 KDa

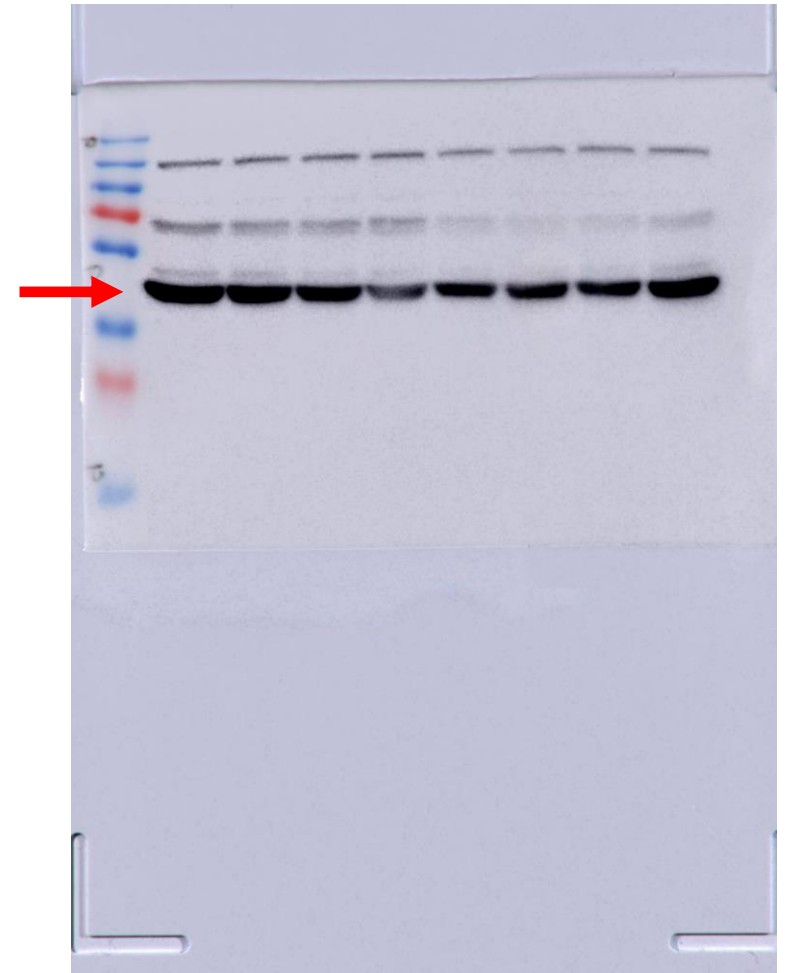

Actin- 45 KDa

The order of lanes: Left- (Ct-Ct+Psi5-Ct+Psi10-Ct+Psi15-LPS-LPS+Psi5-LPS+Psi10-LPS+Psi15) -Right



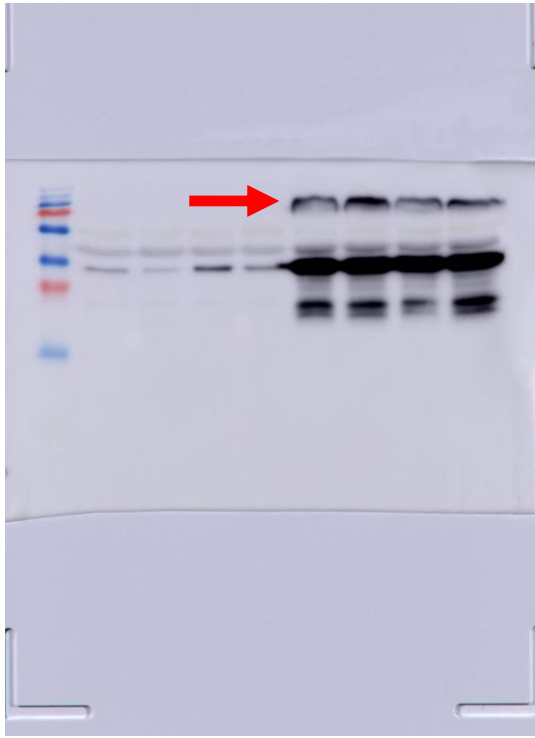

Cox-2- 74KDa

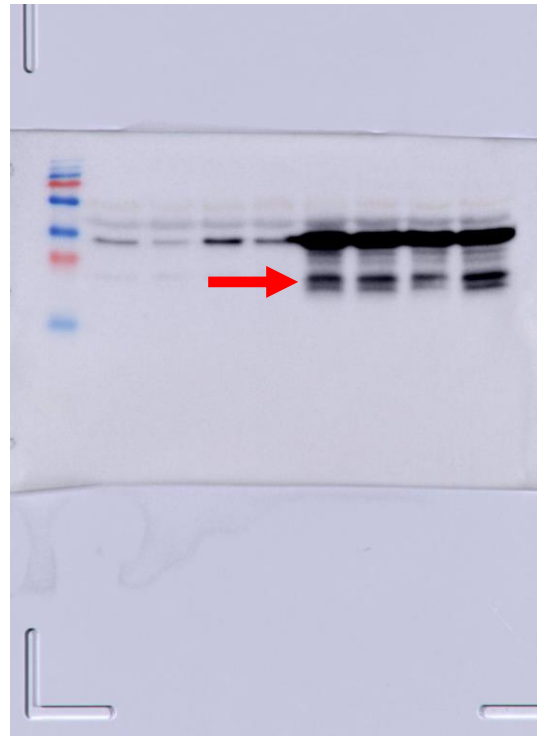

IL-6- 21 KDa

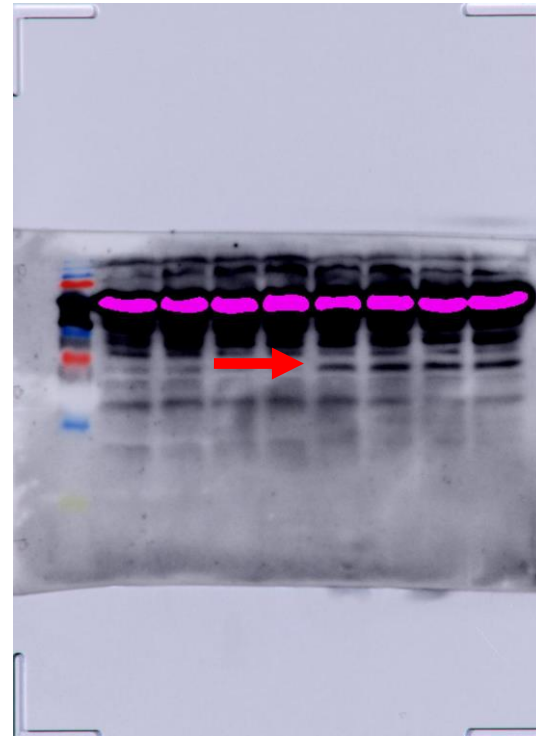

Pro-TNFalpha- 25 KDa

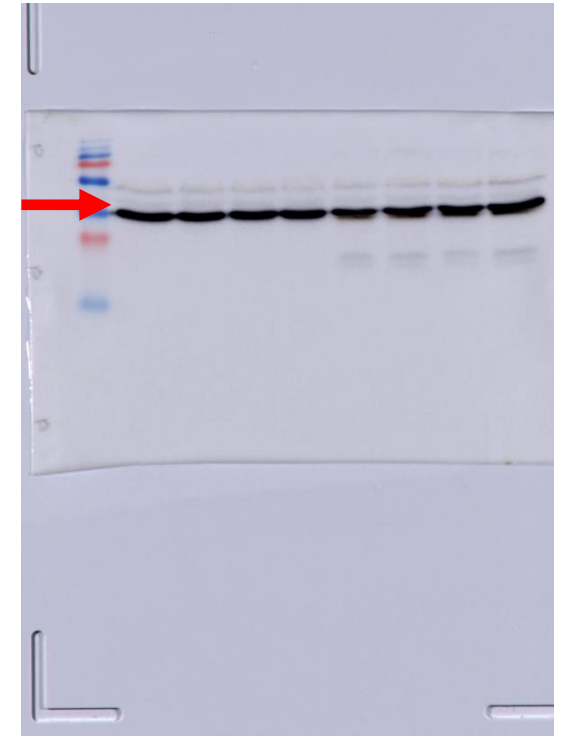

GAPDH- 37 KDa

The order of lanes: Left- (Ct-Ct+Psi5-Ct+Psi10-Ct+Psi15-LPS-LPS+Psi5-LPS+Psi10-LPS+Psi15) -Right



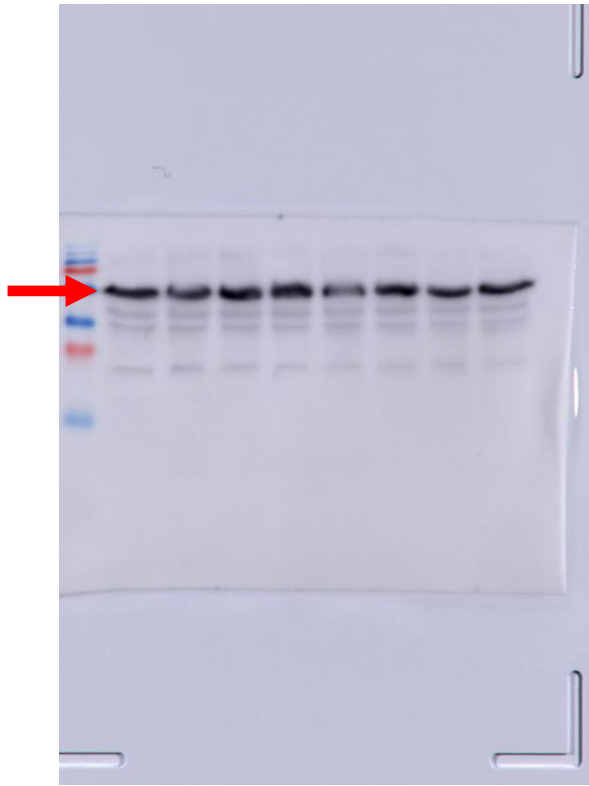

SR-2B- 55KDa

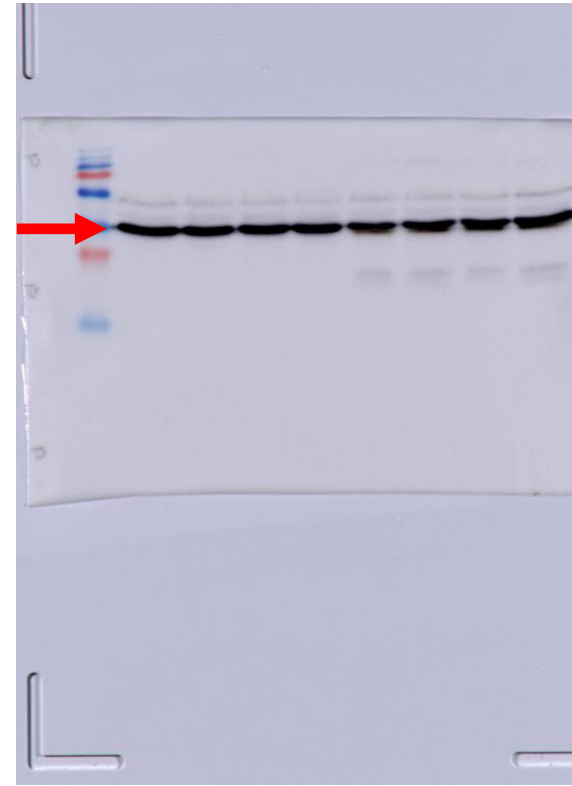

GAPDH- 37 KDa

The order of lanes: Left- (Ct-Ct+Psi5-Ct+Psi10-Ct+Psi15-LPS-LPS+Psi5-LPS+Psi10-LPS+Psi15) -Right

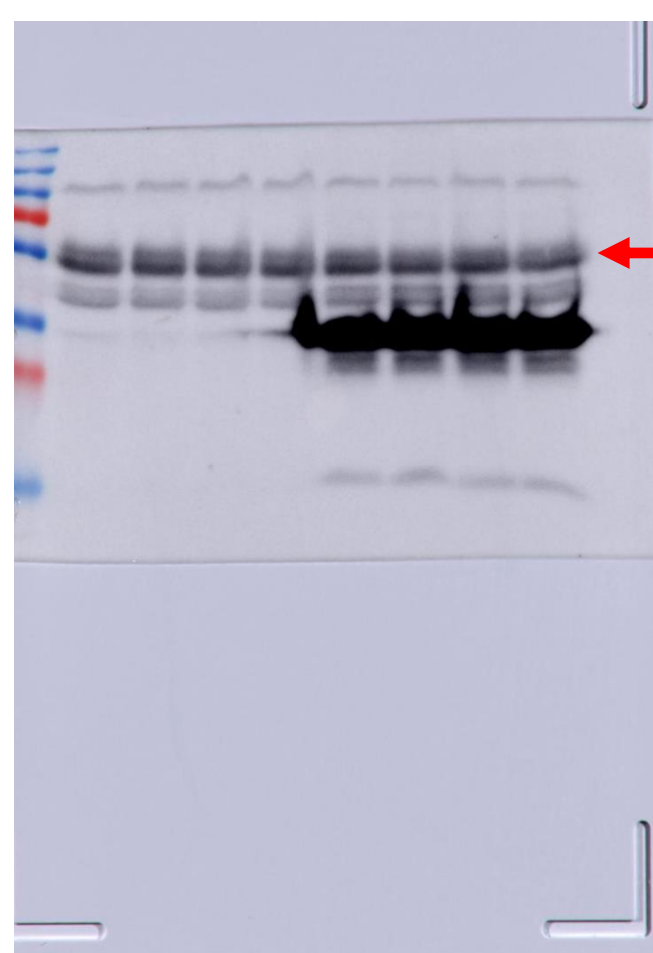

PANX-1- 55 KDa

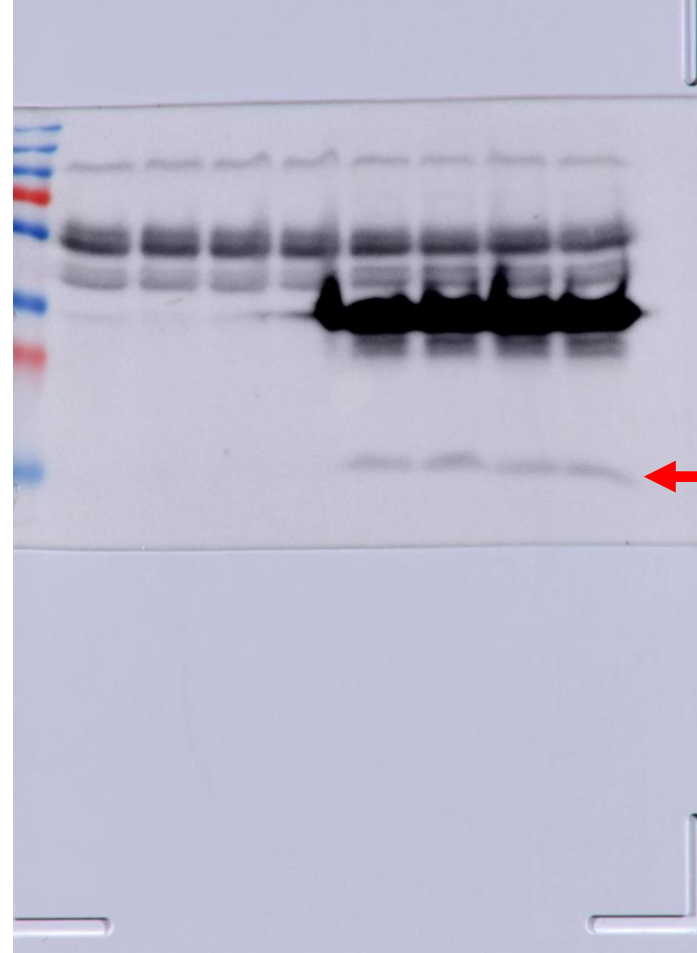

PANX-1- 19 KDa

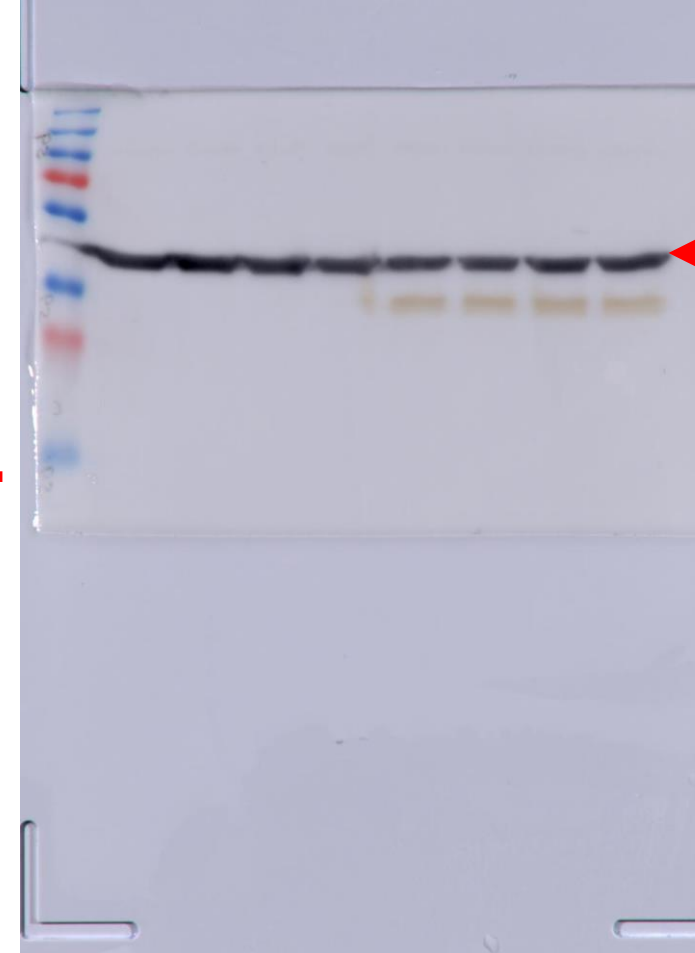

Actin- 45 KDa

The order of lanes: Left- (Ct-Ct+Psi5-Ct+Psi10-Ct+Psi15-LPS-LPS+Psi5-LPS+Psi10-LPS+Psi15) -Right
