# Supplementary material for: The Effects of Psilocybin on Lipopolysaccharide-Induced Inflammation in THP-1 Human Macrophages
Source: MDPI journal article supplement (doi:10.3390/psychoactives3010004), 2024-01-28
Supplement: s1 [file s1]

## Supplementary materials

**Table S1. Information of the primary antibodies.**

| <b>Primary antibody</b>       | <b>Manufacture</b>        | <b>Cat #</b> | <b>Dilution</b> |
|-------------------------------|---------------------------|--------------|-----------------|
| Nlrp3                         | Cell Signaling Technology | 15101S       | 1:1000          |
| Phospho-NFκB-p65 (ser536)     | Cell Signaling Technology | 13346S       | 1:1000          |
| NFκB p-65                     | Santa Cruz Biotechnology  | sc-8008      | 1:200           |
| Phospho-TYK 2 (Tyr-1054/1055) | Cell Signaling Technology | 9321S        | 1:500           |
| TYK 2                         | Cell Signaling Technology | 14193S       | 1:1000          |
| TNFα                          | Cell Signaling Technology | 3707         | 1:500           |
| PANX-1                        | Cell Signaling Technology | 91137S       | 1:1000          |
| Cox-2                         | Cell Signaling Technology | 12282        | 1:1000          |
| β-actin                       | Santa Cruz Biotechnology  | sc-47778     | 1:200           |
| GAPDH                         | Santa Cruz Biotechnology  | sc-32233     | 1:200           |
| Phospho-STAT3(Tyr-705)        | Santa Cruz Biotechnology  | sc-8059      | 1:200           |
| STAT3                         | Santa Cruz Biotechnology  | sc-8019      | 1:200           |
| IL-1β                         | Abcam                     | ab216995     | 1:500           |
| GAPDH                         | Cell Signaling Technology | 2118         | 1:1000          |
| Tubulin                       | Santa Cruz Biotechnology  | sc-8035      | 1:200           |
| IL-6                          | Cell Signaling Technology | 12153        | 1:1000          |

**Table S2. The sequences of primers used for q-RT-PCR.**

|                                     |         |                          |
|-------------------------------------|---------|--------------------------|
| <i>Human-IL-6</i>                   | Forward | GGAGACTTGCCTGGTGAAA      |
| <i>Human-IL-6</i>                   | Reverse | CTGGCTTGTTCTCACTACTC     |
| <i>Human-COX-2</i>                  | Forward | TACTGGAAGCCAAGCACTTT     |
| <i>Human-COX-2</i>                  | Reverse | GGACAGCCCTTCACGTTATT     |
| <i>Human-TNF<math>\alpha</math></i> | Forward | CCAGGGACCTCTCTCTAATCA    |
| <i>Human-TNF<math>\alpha</math></i> | Reverse | TCAGCTTGAGGGTTTGCTAC     |
| <i>Human-Pannexin-1(PANX-1)</i>     | Forward | GTGTGCAGCATCAAATCAGG     |
| <i>Human-Pannexin-1(PANX-1)</i>     | Reverse | GACACTGAGCAACTGGAAGA     |
| <i>Human-P2X7</i>                   | Forward | CTTCCGAGAAACAGGCGATAA    |
| <i>Human-P2X7</i>                   | Reverse | TAGGTTGCAGTCCCAGTAGA     |
| <i>Human- NLRP3</i>                 | Forward | GAAGAGGAGTGGATGGGTTTAC   |
| <i>Human- NLRP3</i>                 | Reverse | TCTGCTTCTCACGTACTIONTCTG |
| <i>Human-IL-1<math>\beta</math></i> | Forward | CCTTAGGGTAGTGCTAAGAGGA   |
| <i>Human-IL-1<math>\beta</math></i> | Reverse | AAGTGAGTAGGAGAGGTGAGAG   |
| <i>Human-ACTIN</i>                  | Forward | GGCATCCTCACCTGAAGTA      |
| <i>Human-ACTIN</i>                  | Reverse | CACACGCAGCTCATTGTAGAAG   |
| <i>Human-GAPDH</i>                  | Forward | CAGGAGGCATTGCTGATGAT     |
| <i>Human-GAPDH</i>                  | Reverse | GAAGGCTGGGGCTCATT        |
